# Supplementary material for: Thrombocytopenia-associated mutations in the ANKRD26 regulatory region induce MAPK hyperactivation
Source: JCI journal article supplement (doi:10.1172/jci71861), 2014-01-15
Supplement: sd1 [file 1]

# Supplementary data

## Supplementary figure 1

**A**

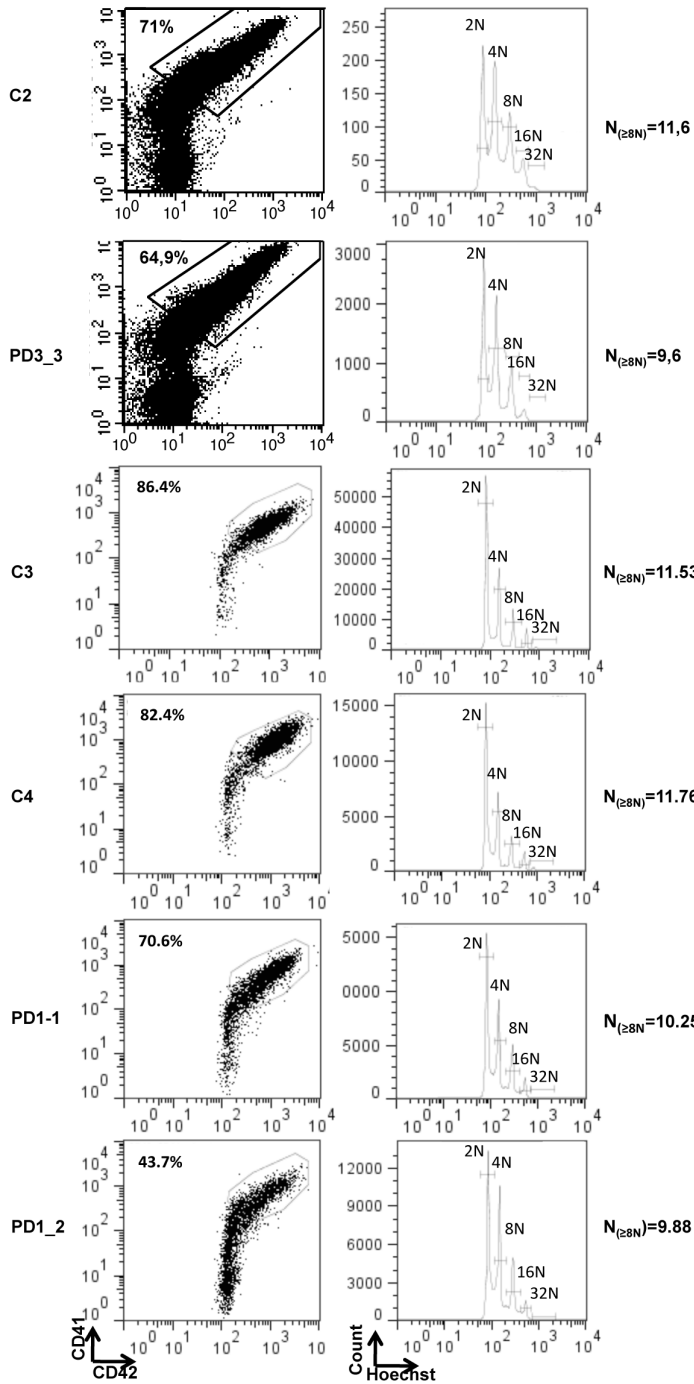

**B**

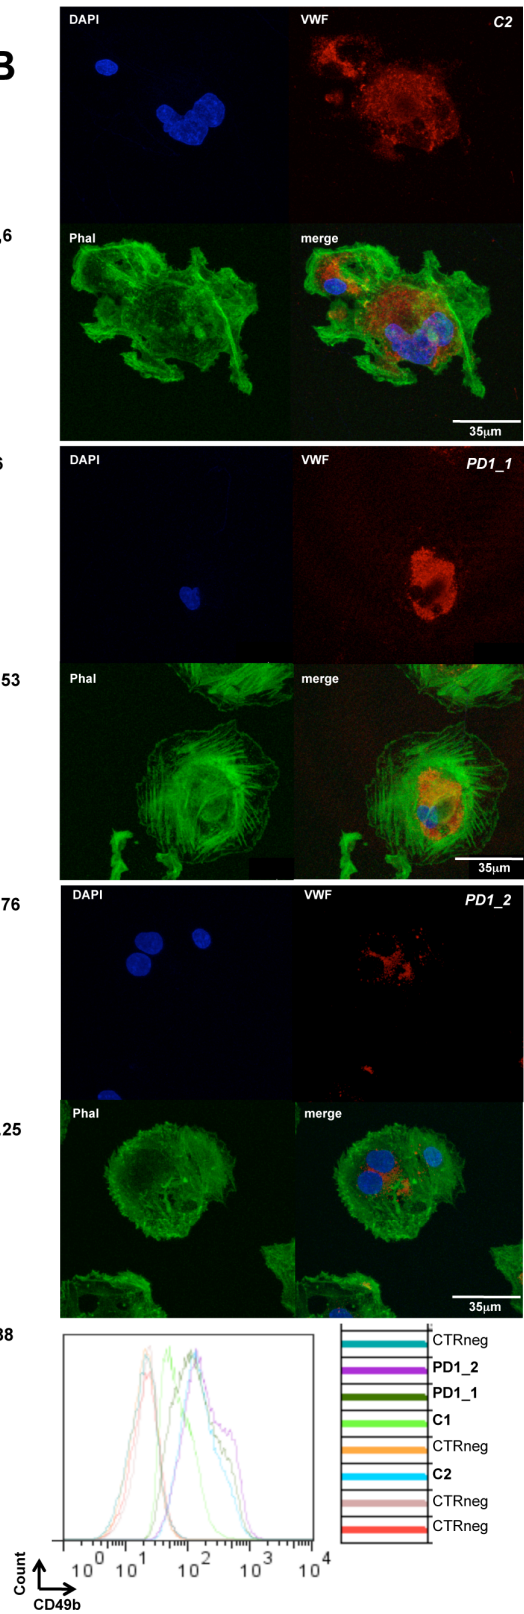

## Supplementary figure 1

### **In vitro derived MK differentiation of THC2 patients.**

In vitro MK differentiation was induced from control or patient peripheral blood CD34<sup>+</sup> progenitors in presence of thrombopoietin (TPO) and stem cell factor (SCF). Analysis of mature MKs was performed at day 10 of culture. **(A)** Gates represent mature MKs expressing CD41 and CD42 markers (left panel). The ploidy level was analyzed in the gate of mature (CD41<sup>+</sup>CD42<sup>+</sup>) MKs. The ploidy level (N) determination was based on the percentage of cells in 8N, 16N and 32N gates. **(B)** The histograms represent the expression level of CD49b (integrin  $\alpha$ 2) on the surface of mature (CD41<sup>+</sup>CD42<sup>+</sup>) MKs. Two controls (C1, C2) and two patients (PD1\_1 and PD1\_2) were studied. CTRneg corresponds to the CD49b staining on the CD41<sup>-</sup>CD42<sup>-</sup> cell population for each sample. The pictures show the MKs forming stress fibers after adhesion on collagen type 1. Nucleus staining (DAPI) is in blue color, Phalloidin staining (Phal) is in green color and Von Willebrand Factor staining (VWF) is in red color.

## Supplementary figure 2

**A**

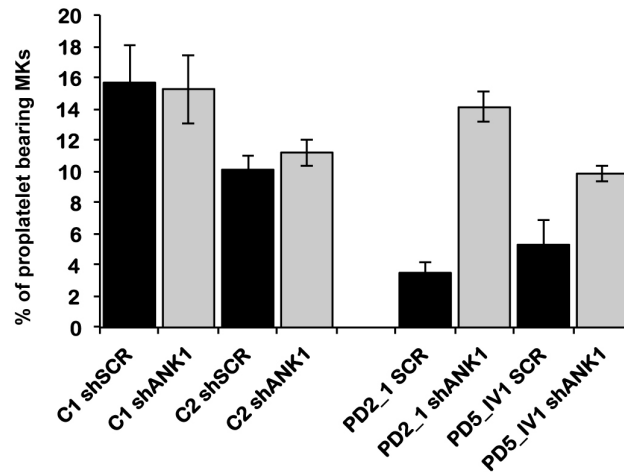

**B**

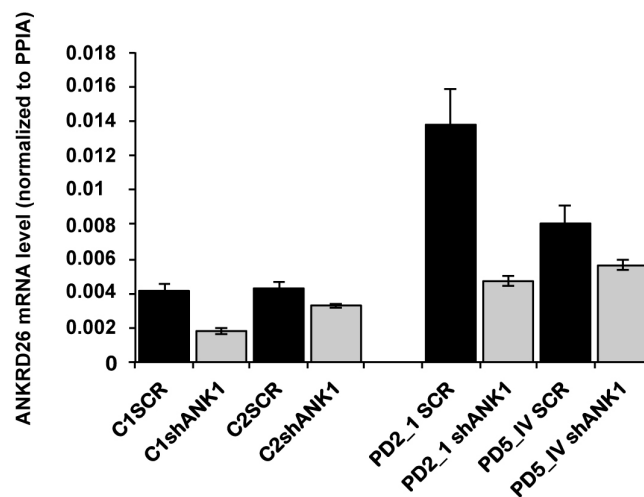

## Supplementary figure 2

### Rescue of proplatelet formation after ANKRD26 inhibition in MKs of patients

Patient peripheral blood CD34<sup>+</sup> progenitors were transduced with control (shSCR) and with shRNA directed against ANKRD26 (shANK1) and cultured in presence of TPO and SCF.

Four days after transduction, they were sorted on the presence of GFP and further cultured in the presence of TPO alone. **(A)** The percentage of PPT forming MKs was estimated in shSCR and shANK1 transduced cells by counting MKs exhibiting one or more cytoplasmic processes. The experiment was performed in triplicate. Data represent mean  $\pm$ SD. **(B)** Q-RT-PCR analysis of ANKRD26 mRNA expression in shSCR and shANK1 transduced MK cells. The results are normalized to PPIA transcript level and represent mean  $\pm$ SD of triplicate. C1 and C2 : controls, PD2\_1 and PD5\_IV : patients.

## Supplementary figure 3

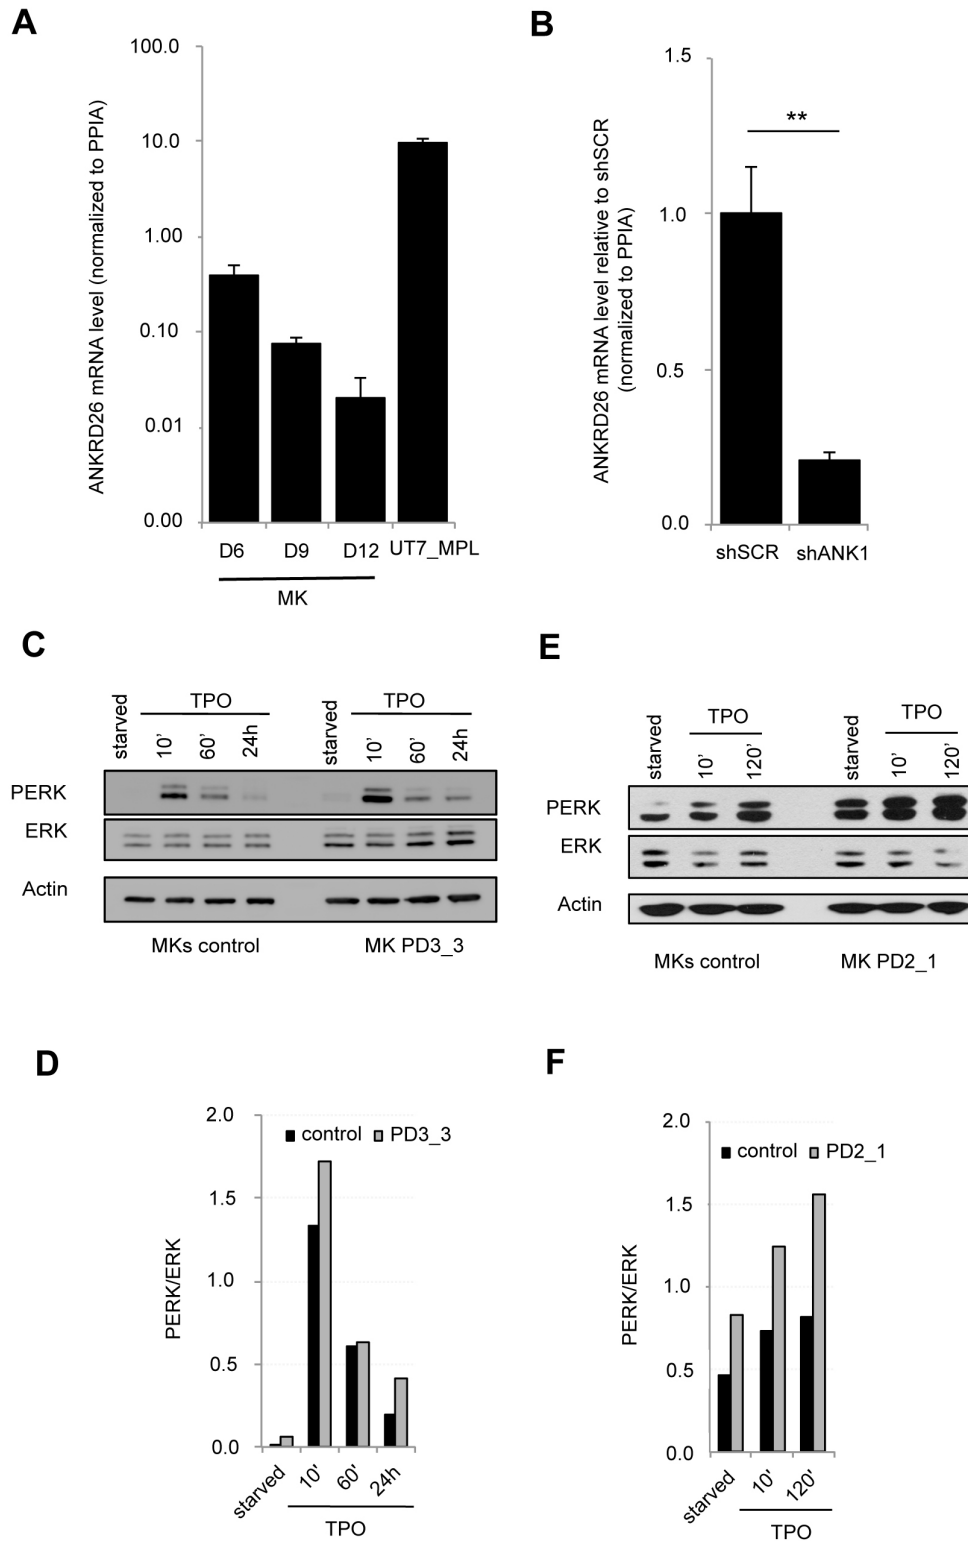

## Supplementary figure 3

Impact of ANKRD26 overexpression in TPO-MPL signaling in THC2 MKs.

**(A)** ANKRD26 expression in UT7/HA-MPL (UT7\_MPL) cell line compared to that in MK at different stages of maturation. In vitro MK differentiation was induced from control peripheral blood CD34<sup>+</sup> progenitors in presence of TPO. Q-RT-PCR analysis of ANKRD26 mRNA was performed at different stages of MK differentiation, CD41<sup>+</sup> cells were sorted at day 6 and studied at three different days of culture (D6 to D12, corresponding to cells with increasing maturity) and in UT7\_MPL cell line. Data represent mean  $\pm$ SD of triplicate. **(B)** UT7\_MPL cell line was transduced with control (shSCR) or with shRNA against ANKRD26 (shANK1) lentiviruses and the efficiency of shANK was measured by Q-RT-PCR. The ANKRD26 expression level was normalized to PPIA. One of three independent experiments with similar results is presented. Data represent mean  $\pm$ SD of triplicate. **\*\*** $P < 0.01$ , Student's *t* test. **(C-F)** Western blot analysis of ERK, phospho-ERK (PERK), and actin expression in patient MKs. Mature MKs were derived from control or patient blood CD34<sup>+</sup> cells in presence of TPO and SCF. At D8 of culture, they were starved for 24 hours, without cytokines, and stimulated by TPO (50ng/ml) during 10, 60 minutes and 24 hours (PD3\_3) or during 10 and 120 minutes (PD2\_1). Western blot analysis of ERK, PERK, and actin expression in patient PD3\_3 MKs and control MKs **(C)**, in patient PD2\_1 MKs and control MKs **(E)**. **(D, F)** Histograms represent PERK/ERK protein ratio.

## Supplementary figure 4

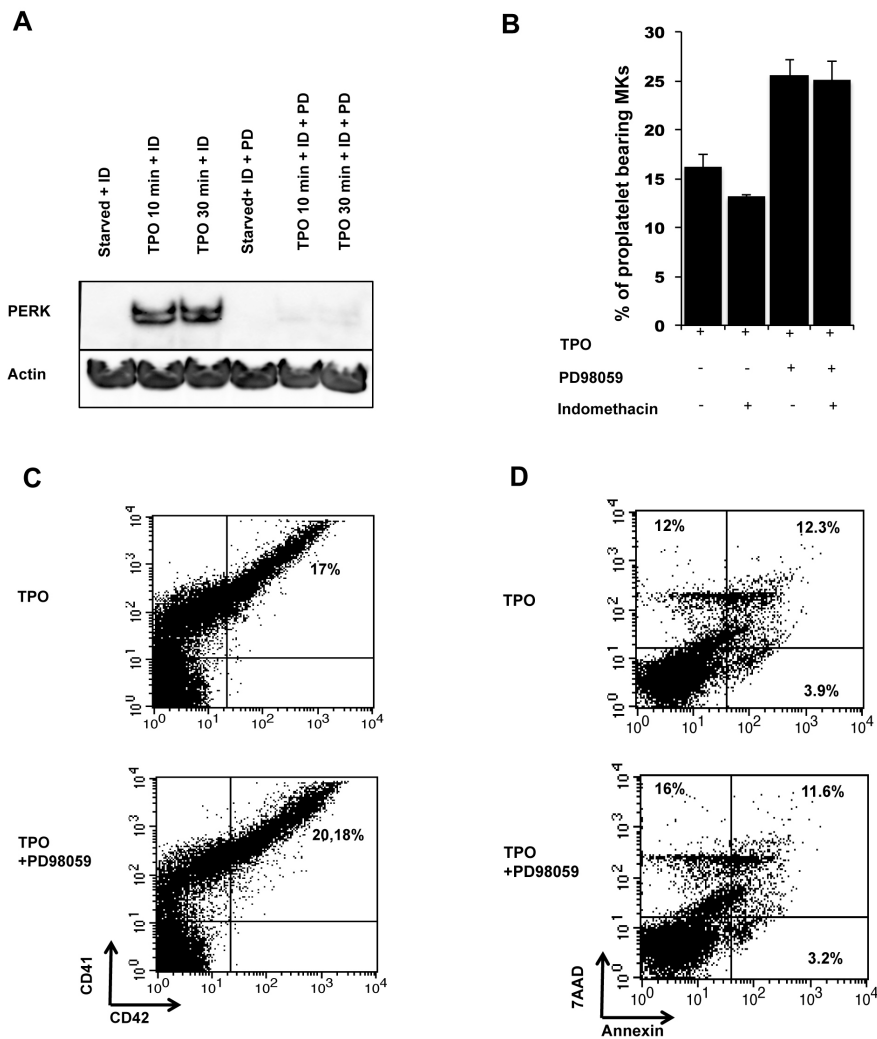

## Supplementary figure 4

### Effect of MEK inhibitor PD98059 on MK differentiation, proplatelet formation and apoptosis

CD34<sup>+</sup> cells were cultured in the presence of TPO to induce MK differentiation. (A) Western blot analysis of ERK and phospho-ERK (PERK) at day 8 of culture showing that the indomethacin (ID) at concentration 10  $\mu$ M does not inhibit the ERK phosphorylation. When PD98059 (PD) was added at concentration 10  $\mu$ M 1 hour after indomethacin, the ERK

phosphorylation (PERK) was almost completely abolished. **(B)** Proplatelet formation evaluated at day 13 of MK differentiation. The TPO was added at day 0 of culture, the indomethacin and PD98059 both at concentration of 10  $\mu$ M at day 8 of culture. Data were collected from triplicate wells and represent mean  $\pm$ SD. **(C, D)** The PD98059 at 10  $\mu$ M was added to the culture at day 0 and day 3 and cells were analyzed at day 7. **(C)** Cells expressing both CD41 and CD42 markers represent MKs. The fraction of cells positive for Annexin-V and 7AAD represent cells undergoing apoptosis **(D)**. Experiments were performed 3 times with similar results.



## Supplementary figure 5

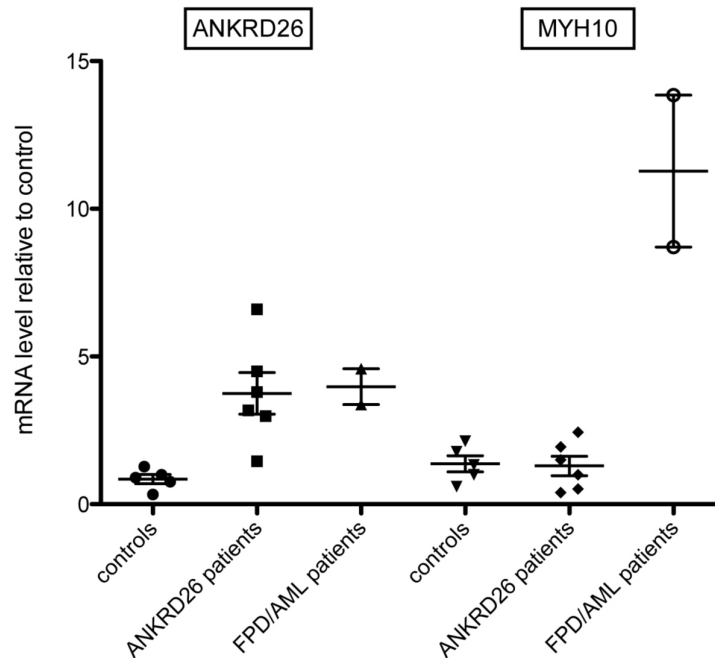

### Supplementary figure 5

#### Analysis of ANKRD26 and MYH10 mRNA level in THC2 and FPD/AML platelets.

mRNAs were isolated from platelets of 2 patients with familial platelet disorder with predisposition to acute myeloid leukemia (FPD/AML patients) and 6 THC2 patients (ANKRD26 patients) and 5 controls. ANKRD26 and MYH10 mRNA levels were analyzed relatively to controls mRNA and normalized to PPIA.

Supplementary Table 1

Clinical characteristics of THC2 pedigrees

| Pedigree | Age at diagnosis (years) | Current age (years) | Platelet count ( $\times 10^9/L$ ) | MPV (fL) | Hemoglobin (g/dL) | Leukocytes ( $\times 10^9/L$ ) | 5'UTR ANKRD26 Mutation | TPO level (ng/L) |
|----------|--------------------------|---------------------|------------------------------------|----------|-------------------|--------------------------------|------------------------|------------------|
| PD1_2    | 64                       | 65                  | 30                                 | 10       | 14.2              | 12.3                           | c.-119(C/A)            | ND               |
| PD2_1    | 50                       | 51                  | 45                                 | 9.9      | 16.3              | 6.8                            | c.-118(C/A)            | 280              |
| PD2_2    | 16                       | 17                  | 82                                 | 10.5     | 14.8              | 7.7                            | c.-118(C/A)            | 132              |
| PD3_1    | 26                       | 27                  | 25                                 | 11.7     | 15.8              | 6.9                            | c.-127(A/T)            | 150              |
| PD3_2    | 1                        | 2                   | 84                                 | 9.9      | 12.6              | 11.4                           | c.-127(A/T)            | 195              |
| PD3_3    | 35                       | 36                  | 40                                 | 9.9      | 15.2              | 9                              | c.-127(A/T)            | 158              |
| PD3_4    | 6                        | 7                   | 24                                 | NK       | 14.1              | 6.7                            | c.-127(A/T)            | 180              |
| PD3_5    | 63                       | 64                  | 36                                 | 10.2     | 9.9               | 14.3                           | c.-127(A/T)            | 173              |
| PD4_I2   | 38                       | 39                  | 81                                 | 10       | 14                | 6.6                            | c.-128(G/C)            | ND               |
| PD4_II1  | 2                        | 3                   | 24                                 | 14       | 12.3              | 12.1                           | c.-128(G/C)            | 185              |
| PD5_III3 | 61                       | 62                  | 26                                 | 11       | 13.7              | 7.2                            | c.-127delAT            | 173              |
| PD5_III4 | 48                       | 49                  | 54                                 | 10.5     | 16.6              | 6.5                            | c.-127delAT            | 113              |
| PD5_III2 | 34                       | 40                  | 55                                 | 9.7      | 15.9              | 7.7                            | c.-127delAT            | 97               |
| PD5_IV1  | 2                        | 3                   | 56                                 | 9.7      | 12.4              | 6.6                            | c.-127delAT            | 178              |
| PD6_1    | 65                       | 66                  | 38                                 | 6.9      | 15.5              | 8.9                            | c.-118C>T              | 39               |
| PD6_2    | 32                       | 36                  | 55                                 | 9.8      | 15                | 5.6                            | c.-118C>T              | 56               |
| PD7      | 58                       | 58                  | 26                                 | 10.7     | 12.5              | 6.5                            | c.-128G>A              | 191              |
| PD8      | 22                       | 24                  | 38                                 | 9        | 13                | 6.5                            | c.-128G>A              | 104              |
| PD9      | 32                       | 34                  | 28                                 | NK       | 13.6              | 6.8                            | c.-128G>A              | 115              |
| PD10_1   | 61                       | 62                  | 8                                  | 7.6      | 12                | 7                              | c.-125T>G              | 232              |
| PD10_2   | 38                       | 39                  | 12                                 | 10.8     | 17.3              | 13.8                           | c.-125T>G              | 148.4            |
| PD11_1   | 18                       | 21                  | 25                                 | 7.1      | 13.8              | 10.8                           | c.-134G>A              | ND               |
| PD11_2   | 26                       | 28                  | 63                                 | 7.4      | 17.3              | 9.6                            | c.-134G>A              | ND               |
| PD11_3   | 25                       | 27                  | 35                                 | 7.3      | 14.6              | 7.3                            | c.-134G>A              | ND               |
| PD11_4   | 51                       | 53                  | 32                                 | 7.2      | 16.9              | 7.05                           | c.-134G>A              | ND               |
| PD11_5   | 37                       | 39                  | 15                                 | 8        | 15.4              | 6.5                            | c.-134G>A              | ND               |
| PD11_6   | 48                       | 50                  | 54                                 | 7.9      | 15.8              | 6.03                           | c.-134G>A              | ND               |
| PD11_7   | 44                       | 46                  | 33                                 | 9        | 14.8              | 10                             | c.-134G>A              | ND               |
| PD11_8   | 26                       | 28                  | 47                                 | 8.1      | 15.7              | 6.6                            | c.-134G>A              | ND               |
| PD11_9   | 43                       | 45                  | 26                                 | 11.3     | 16.4              | 13.2                           | c.-134G>A              | ND               |
| PD11_10  | 13                       | 15                  | 36                                 | 9.8      | 14.4              | 7.8                            | c.-134G>A              | ND               |

normal TPO level: <30ng/L

MPV means mean platelet volume; NK, not known; ND, not done

**Supplementary Table 2**

| Oligos name | Sequence 5' 3'                   | Experiment type    |
|-------------|----------------------------------|--------------------|
| PPIA_F      | GTCAACCCCACCGTGTTCCTT            | Q-PCR              |
| PPIA_R      | CTGCTGTCTTTGGGACCTTGT            | Q-PCR              |
| HPRT_F      | GGCAGTATAATCCAAAGATGGTCAA        | Q-PCR              |
| HPRT_R      | TCAAATCCAACAAAGTCTGGCTTATAT      | Q-PCR              |
| ANKRD26_F   | CTATGTCAGAGGCTTCACTGGAG          | Q-PCR              |
| ANKRD26_R   | CTCAGCACATCTGACAGCTTCTG          | Q-PCR              |
| FLI_F       | ACGGAAGTGCTGTTGTCACACC           | Q-PCR              |
| FLI_R       | CAAGCTCCTCTTCTGACTGAGTC          | Q-PCR              |
| RUNX1_F     | TGCAAGATTTAATGACCTCAGGTTT        | Q-PCR              |
| RUNX1_R     | TGAAGACAGTGATGGTCAGAGTGA         | Q-PCR              |
| ANK_A_F     | CGGAGGGAGAGATTGAAAAC             | ChIP-QPCR          |
| ANK_A_R     | CGGAGCCCAACATAACAAGT             | ChIP-QPCR          |
| C1_F        | GAGCAGAGAATGGGCATCTT             | ChIP-QPCR          |
| C1_R        | GCCCCTCAAAACAACCTCATC            | ChIP-QPCR          |
| C2_F        | ACATTGGTACCCAATCTGGA             | ChIP-QPCR          |
| C2_R        | AGTGTTGTCCCTTCCTGCAAAG           | ChIP-QPCR          |
| prANKRD26_F | GACTATGCTAGCGGCCAGGCCGACCGG      | luciferase cloning |
| prANKRD26_R | GACTATGGTACCCTGAACACTCAGCCAGACTC | luciferase cloning |
| shFLI       | AGTTCACTGCTGGCCTATA              | lentiviral cloning |
| shANK1      | GAAAGAAGTTGAAGTAAA               | lentiviral cloning |
| shANK2      | GGATGATGTTGATGACTTA              | lentiviral cloning |
